# Supplementary material
Source: HighWire-hosted journal article supplement (https://ez-admanager.com/highwire/filestream/136536/field_highwire_adjunct_files/0/tsai_840.pdf)
Supplement: tsai_840.pdf [file tsai_840.pdf]

# 丙型肝炎病毒感染是帕金森病的危险因素

Hsin-Hsi Tsai, MD; Horng-Huei Liou, MD; Chih-Hsin Muo, MSc; Cha-Ze Lee, MD ;

Ruoh-Fang Yen, MD, PhD; Chia-Hung Kao, MD

**目的：**确定丙型肝炎病毒(hepatitis C virus, HCV)感染是否是帕金森病(Parkinson disease, PD)发病的危险因素。

**方法：**以人口为基础的队列研究数据来源于台湾健康保险调查数据库中 2000 年 ~2010 年的数据集。囊括了 49,967 例病毒性肝炎患者的资料用于分析。199,863 例未患病毒性肝炎的患者作为对照组。病毒性肝炎患者进一步分为三组：乙肝病毒(hepatitis B virus, HBV)感染、HCV 感染、HBV-HCV 合并感染。计算每一队列进行性 PD 的发病率。使用 Cox 比例风险模型, 通过危险比(hazard ration, HR)和 95% 可信区间(confidence interval, CI)评估进展为 PD 的风险。

**结果：**进展为 PD 的粗 HR 分别为：HBV 感染 0.66 (95%CI 0.55~0.80)、HCV 感染 2.50 (95%CI 2.07~3.02)、HBV-HCV 合并感染 1.28(95%CI 0.88~1.85)。对年龄、性别及合并症进行校正后, HCV 与发生 PD 的相关性仍有统计学意义(校正 HR = 1.29, 95%CI =1.06~1.56)。

**结论：**我们开展的一项大型的、以人口为基础的研究发现, HCV 感染患者发生 PD 的风险明显增加。

**Neurology® 2016;86:840–846**

(陈康宁 审校)
